# Supplementary material for: Functional analysis of the C. elegans cyld-1 gene reveals extensive similarity with its human homolog
Source: PubMed Central journal article supplement (PMC5796713; doi:10.1371/journal.pone.0191864), 2018-02-02
Supplement: pone.0191864.s001.pdf [file pone.0191864.s001.pdf]

|                     | <b>A</b> | <b>B</b> | <b>C</b> | <b>D</b> | <b>E</b> | <b>F</b> | <b>average</b> | <b>std err</b> | <b>t-test p-value</b> |
|---------------------|----------|----------|----------|----------|----------|----------|----------------|----------------|-----------------------|
| -                   | 1,00     | 1,00     | 1,00     | 1,00     | 1,00     | 1,00     | 1,00           | 0,00           |                       |
| TRAF2               | 155,37   | 257,60   | 128,56   | 125,72   | 259,07   | 224,66   | 191,83         | 25,58          |                       |
| TRAF2 + HsCYLD      | 1,88     | 1,64     | 1,43     | 2,66     | 8,98     | 3,62     | 3,37           | 1,17           | 0,000645              |
| TRAF2 + CeCYLD      | 4,30     | 1,42     | 8,33     | 3,77     | 25,66    | 38,15    | 13,60          | 6,08           | 0,000623              |
| TRAF2 + CeCYLDC774S | 69,80    | 66,79    | 156,56   | 22,68    | 277,19   | 229,81   | 137,14         | 41,30          | 0,019007              |
