# Supplementary material for: Functional analysis of the C. elegans cyld-1 gene reveals extensive similarity with its human homolog
Source: PubMed Central journal article supplement (PMC5796713; doi:10.1371/journal.pone.0191864), 2018-02-02
Supplement: pone.0191864.s002.pdf [file pone.0191864.s002.pdf]

|                     | <b>A</b> | <b>B</b> | <b>C</b> | <b>D</b> | <b>E</b> | <b>average</b> | <b>std err</b> | <b>t-test p-value</b> |
|---------------------|----------|----------|----------|----------|----------|----------------|----------------|-----------------------|
| -                   | 1        | 1        | 1        | 1        | 1        | 1,00           |                |                       |
| TRAF2               | 1,43     | 3,17     | 1,64     | 3,07     | 2,8      | 2,42           | 0,37           |                       |
| TRAF2 + HsCYLD      | 0,81     | 1,03     | 1,12     | 1,36     | 1,53     | 1,17           | 0,13           | 0,016                 |
| TRAF2 + CeCYLD      | 0,53     | 0,69     | 0,45     | 0,99     | 0,89     | 0,71           | 0,10           | 0,004                 |
| TRAF2 + CeCYLDC774S | 1,21     | 1,86     | 1,07     | 1,5      | 2,15     | 1,56           | 0,20           | 0,005                 |
