# Supplementary material for: Functional analysis of the C. elegans cyld-1 gene reveals extensive similarity with its human homolog
Source: PubMed Central journal article supplement (PMC5796713; doi:10.1371/journal.pone.0191864), 2018-02-02
Supplement: pone.0191864.s003.pdf [file pone.0191864.s003.pdf]

|                            | A     | B     | C     | D     | average | std err | t-test p-value |
|----------------------------|-------|-------|-------|-------|---------|---------|----------------|
| -                          | 1,0   | 1,0   | 1,0   | 1,0   | 1,0     | 0,00    |                |
| TNF $\alpha$               | 198,3 | 104,5 | 127,2 | 177,6 | 151,9   | 21,74   |                |
| TNF $\alpha$ + HsCYLD      | 117,4 | 37,4  | 104,0 | 151,2 | 102,5   | 23,88   | 0,042267       |
| TNF $\alpha$ + CeCYLD      | 28,2  | 18,0  | 38,6  | 52,1  | 34,2    | 7,28    | 0,00934        |
| TNF $\alpha$ + CeCYLDC774S | 153,0 | 152,8 | 178,5 | 181,9 | 166,5   | 7,90    | 3,19E-05       |
